# Supplementary material
Source: Research Square preprint supplement (doi:10.21203/rs.3.rs-9148396/v1)
Supplement: Supplementary file 1 [file 5ec036f47095b73e4fe84de3.docx]

**SUPPLEMENTARY INFORMATION**

**Solubility-Improved and Antitumor Activity of (-)-Cannabidiol Conjugates**

Daniel Crespo,a,b Javier Moreno, c,d,e Cristina Mesas,c,d,e Amelia Díaz,a,b Iván Cheng-Sánchez, a,b Francisco Sarabia,a,b J. Manuel López-Romero,a,b* Consolación Melguizo,c,d,eJosé Pradosc,d,e

a Dpto. Química Orgánica, Facultad de Ciencias, Universdad de Málaga, Boulevard Louis Pasteur 31, 29071 Málaga, Spain

b Instituto Universitario de Materiales y Nanotecnología, IMANA, University of Málaga, Campus de Teatinos, 29071, Málaga, Spain

c Instituto de Investigación Biosanitaria de Granada (ibs. GRANADA), 18014 Granada, Spain

d Institute of Biopathology and Regenerative Medicine (IBIMER), Center of Biomedical Research (CIBM), University of Granada, 18100 Granada, Spain

e Dep. of Anatomy and Embryology, Faculty of Medicine, University of Granada. 18071 Granada, Spain

* Corresponding author: J. M. López-Romero (jmromero@uma.es)

**Figure SI1.** 1H NMR of compound **1a** (500 Hz, CDCl3).

**Figure SI2.** 13C NMR of compound **1a** (100 Hz, CDCl3).

**Figure SI3.** 1H NMR of compound **1b** (500 Hz, CDCl3).

**Figure SI4.** 13C NMR of compound **1b** (100 Hz, CDCl3).

**Figure SI5.** 1H NMR of compound **2a** (500 Hz, CDCl3).

**Figure SI6.** 13C NMR of compound **2a** (100 Hz, CDCl3).

**Figure SI7.** 1H NMR of compound **2b** (500 Hz, CDCl3).

**Figure SI8.** 13C NMR of compound **2b** (100 Hz, CDCl3).

**Figure SI9.** 1H NMR of compound **3** (500 Hz, CDCl3).

**Figure SI10.** 13C NMR of compound **3** (100 Hz, CDCl3).

**Figure SI11.** 1H NMR of compound **4** (500 Hz, CDCl3).

**Figure SI12.** 13C NMR of compound **4** (100 Hz, CDCl3).
